# Supplementary material for: Using Passive Smartphone Sensing for Improved Risk Stratification of Patients With Depression and Diabetes: Cross-Sectional Observational Study
Source: PubMed Central journal article supplement (PMC6371066; doi:10.2196/11041), 2019-01-29
Supplement: mhealth_v7i1e11041_app2.pdf [file mhealth_v7i1e11041_app2.pdf]

## रुग्ण आरोग्य प्रश्नावली - 9 (PHQ-9)

मागील 2 आठवड्यांच्या काळात, आपल्याला खालील पैकी कोणत्याही  
समस्येमुळे कितीवेळा त्रास झाला आहे ?  
(आपले उत्तर '✓' अशी खूण करून द्या)

|                                                                                                                                                                                    | अजिबात<br>नाही | अनेक<br>दिवस | अर्ध्याहून<br>अधिक<br>दिवस | जवळपास<br>प्रत्येक<br>दिवशी |
|------------------------------------------------------------------------------------------------------------------------------------------------------------------------------------|----------------|--------------|----------------------------|-----------------------------|
| 1. गोष्टी करण्यात थोडीशी रुचि किंवा आनंद                                                                                                                                           | 0              | 1            | 2                          | 3                           |
| 2. हताश, उद्वीग्नता, किंवा निराश वाटणे                                                                                                                                             | 0              | 1            | 2                          | 3                           |
| 3. झोप लागण्यात किंवा झोपलेले राहण्यात समस्या, किंवा खूप झोप येणे                                                                                                                  | 0              | 1            | 2                          | 3                           |
| 4. थकलेले किंवा थोडी ऊर्जा असल्याचे वाटले                                                                                                                                          | 0              | 1            | 2                          | 3                           |
| 5. भूक मंदावणे किंवा अति खाणे                                                                                                                                                      | 0              | 1            | 2                          | 3                           |
| 6. स्वतःबद्दल वाईट वाटणे — किंवा आपण अपयशी आहोत किंवा आपण<br>स्वतःचा किंवा आपल्या कुटुंबाचा अपेक्षाभंग केला आहे असे वाटणे                                                          | 0              | 1            | 2                          | 3                           |
| 7. वर्तमानपत्र वाचणे किंवा टेलिव्हिजन पाहणे यासारख्या गोष्टींवर लक्ष<br>एकाग्र करण्यास त्रास होणे                                                                                  | 0              | 1            | 2                          | 3                           |
| 8. हालचाल किंवा बोलणे इतके संथ होते की इतर लोकांच्या लक्षात येणे?<br>किंवा याच्या उलट — इतके चिंताक्रांत किंवा अस्वस्थ होणे की आपण<br>सामान्यपेक्षा बरेच अधिक इकडे-तिकडे फिरत आहात | 0              | 1            | 2                          | 3                           |
| 9. आपण मेलो असतो तर चांगले झाले असते किंवा स्वतःला काही<br>प्रकाराने जखमी करून घेण्याचे विचार                                                                                      | 0              | 1            | 2                          | 3                           |

FOR OFFICE CODING 0 + \_\_\_\_\_ + \_\_\_\_\_ + \_\_\_\_\_  
=Total Score: \_\_\_\_\_

आपण कोणत्याही समस्येवर खूण केल असेल तर, आपले काम करणे, घरी वस्तुंची काळजी घेणे, किंवा इतर लोकांसोबत  
वावरणे यामधे या समस्यांनी आपल्याला किती अवघड झाले ?

| अजिबात अवघड<br>झाले नाही | थोडेफार<br>अवघड          | खूप<br>अवघड              | अत्यंत<br>अवघड           |
|--------------------------|--------------------------|--------------------------|--------------------------|
| <input type="checkbox"/> | <input type="checkbox"/> | <input type="checkbox"/> | <input type="checkbox"/> |
