# Supplementary material for: Using Passive Smartphone Sensing for Improved Risk Stratification of Patients With Depression and Diabetes: Cross-Sectional Observational Study
Source: PubMed Central journal article supplement (PMC6371066; doi:10.2196/11041), 2019-01-29
Supplement: mhealth_v7i1e11041_app4.pdf [file mhealth_v7i1e11041_app4.pdf]

## Multimedia Appendix 4: Derived Smartphone Sensing Variables

| Ref No. | Feature                          | Derived smartphone-sensing Variable | Description                                                                                          |
|---------|----------------------------------|-------------------------------------|------------------------------------------------------------------------------------------------------|
| 0       | Symptoms of Depression State     | PHQ-9 states (Dependent variable)   | Binary (Depressed or Not Depressed).<br>Based on self-reported symptoms of depression score on PHQ-9 |
| 1       | Activity and Sleep based Sensing | Active_Total                        | Total number of "active" <sup>a</sup> over a day polled every 2 minutes                              |
| 2       |                                  | Screen_On                           | Total number of "Screen on" <sup>b</sup> over a day polled every 2 minutes                           |
| 3       |                                  | Rel_Grav_SD                         | Standard deviation of "relgrav" <sup>c</sup> over a day polled every 2 minutes                       |
| 4       |                                  | Light_SD                            | Standard deviation of "Light" <sup>d</sup> over a day polled every 2 minutes                         |
| 5       |                                  | Active_Day                          | Total number of "active" over the day-time <sup>e</sup> for the user polled every 2 minutes          |
| 6       |                                  | Day_Screen_On                       | Total number of "Screen on" over the day-time polled every 2 minutes                                 |
| 7       |                                  | Day_Rel_Grav_SD                     | Standard deviation of "relgrav" over the day-time polled every 2 minutes                             |
| 8       |                                  | Day_Light_SD                        | Standard deviation of "Light" over the day-time polled every 2 minutes                               |
| 9       |                                  | Active_Eve                          | Total number of "active" over the evening <sup>f</sup> for the user polled every 2 minutes           |
| 10      |                                  | Screen_On_Eve                       | Total number of "Screen on" over the evening polled every 2 minutes                                  |
| 11      |                                  | Rel_Grav_SD_Eve                     | Standard deviation of "relgrav" over the evening polled every 2 minutes                              |
| 12      |                                  | Light_SD_Eve                        | Standard deviation of "Light" over the evening polled every 2 minutes                                |

| Ref No. | Feature                     | Derived smartphone-sensing Variable        | Description                                                                                      |
|---------|-----------------------------|--------------------------------------------|--------------------------------------------------------------------------------------------------|
| 13      |                             | Active_Night                               | Total number of "active" over the night-time <sup>g</sup> for the user polled every 2 minutes    |
| 14      |                             | Screen_On_Night                            | Total number of "Screen on" over the night-time sampled every 2 minutes                          |
| 15      |                             | Rel_Grav_SD_Night                          | Standard deviation of "relgrav" over the night-time sampled every 2 minutes                      |
| 16      |                             | Light_SD_Night                             | Standard deviation of "Light" over the night-time sampled every 2 minutes                        |
| 17      |                             | Active_AM                                  | Total number of "active" over the morning hours <sup>h</sup> for the user polled every 2 minutes |
| 18      |                             | Screen_On_AM                               | Total number of "Screen on" over the morning hours polled every 2 minutes                        |
| 19      |                             | Rel_Grav_SD_AM                             | Standard deviation of "relgrav" over the morning hours polled every 2 minutes                    |
| 20      |                             | Light_SD_AM                                | Standard deviation of "Light" over the morning hours polled every 2 minutes                      |
| 21      | Communication based sensing | variables.calls.data.total_calls           | Total number of calls (made and received) over a day                                             |
| 22      |                             | variables.calls.data.missed_calls          | Total number of missed calls over a day                                                          |
| 23      |                             | variables.calls.data.total_people_called   | Total number of unique people called (made and received) over a day                              |
| 24      |                             | variables.calls.data.total_call_duration   | Total duration (mins) of calls (made and received) over a day                                    |
| 25      |                             | variables.calls.data.call_count_entropy    | Entropy <sup>i</sup> of call count with respect to distinct people called over a day             |
| 26      |                             | variables.calls.data.call_duration_entropy | Entropy of call duration with respect to distinct people called over a day                       |
| 27      |                             | variables.peak_calls.data.total_calls      | Total number of calls (made and received) over peak hours <sup>i</sup>                           |

| Ref No. | Feature                             | Derived smartphone-sensing Variable                 | Description                                                                                            |
|---------|-------------------------------------|-----------------------------------------------------|--------------------------------------------------------------------------------------------------------|
| 28      |                                     | variables.peak_calls.data.missed_calls              | Total number of missed calls over peak hours                                                           |
| 29      |                                     | variables.peak_calls.data.total_people_called       | Total number of unique people called over peak hours                                                   |
| 30      |                                     | variables.peak_calls.data.total_call_duration       | Total duration (mins) of calls (made + received) over peak hours                                       |
| 31      |                                     | variables.peak_calls.data.call_count_entropy        | Entropy of call count with respect to distinct people called over peak hours                           |
| 32      |                                     | variables.peak_calls.data.call_duration_entropy     | Entropy of call duration with respect to distinct people called over peak hours                        |
| 33      |                                     | variables.off_peak_calls.data.total_calls           | Total number of calls (made and received) over off-peak hours <sup>k</sup>                             |
| 34      |                                     | variables.off_peak_calls.data.missed_calls          | Total number of missed calls over off-peak hours                                                       |
| 35      |                                     | variables.off_peak_calls.data.total_people_called   | Total number of unique people called over off-peak hours                                               |
| 36      |                                     | variables.off_peak_calls.data.total_call_duration   | Total duration (mins) of calls (made and received) over off-peak hours                                 |
| 37      |                                     | variables.off_peak_calls.data.call_count_entropy    | Entropy of call count with respect to distinct people called over off-peak hours                       |
| 38      |                                     | variables.off_peak_calls.data.call_duration_entropy | Entropy of call duration with respect to distinct people called over off-peak hours                    |
| 39      |                                     | Mobility based sensing                              | variables.mobility_radius.data.total                                                                   |
| 40      | variables.mobility_radius.data.peak |                                                     | The maximum distance (meters) between any two geographic coordinates visited by a user over peak hours |
| 41      | variables.mobility_radius           |                                                     | The maximum distance (meters) between                                                                  |

| Ref No. | Feature | Derived smartphone-sensing Variable                   | Description                                                                                                             |
|---------|---------|-------------------------------------------------------|-------------------------------------------------------------------------------------------------------------------------|
|         |         | .data.off_peak                                        | any two geographic coordinates visited by a user over off-peak hours                                                    |
| 42      |         | variables.distance_traveled.data                      | The sum of distance (meters) between every two consecutive geographic coordinates visited by a user over a day          |
| 43      |         | variables.peak_distance_travelled.data                | The sum of distance (meters) between every two consecutive geographic coordinates visited by a user over peak hours     |
| 44      |         | variables.off_peak_distance_traveled.data             | The sum of distance (meters) between every two consecutive geographic coordinates visited by a user over off-peak hours |
| 45      |         | variables.time_spent_at_home.data.total               | Total time (mins) spent at “home location” by the user over a day                                                       |
| 46      |         | variables.time_spent_at_home.data.peak                | Total time (mins) spent at “home location” by the user over peak hours                                                  |
| 47      |         | variables.time_spent_at_home.data.off_peak            | Total time (mins) spent at “home location” by the user over off-peak hours                                              |
| 48      |         | variables.distinct_locations.number_of_locations      | Total number of “distinct locations <sup>m</sup> ” visited by a user over a day                                         |
| 49      |         | variables.distinct_locations.entropy                  | Entropy of number geographic coordinates detected for the user with respect to distinct locations over a day            |
| 50      |         | variables.peak_distinct_locations.number_of_locations | Total number of “distinct locations” visited by a user over peak hours                                                  |
| 51      |         | variables.peak_distinct_locations.entropy             | Entropy of number geographic coordinates detected for the user with respect to distinct locations over peak hours       |
| 52      |         | variables.off_peak_distinct_locations.number_of       | Total number of “distinct locations” visited by a user over off-peak hours                                              |

| Ref No. | Feature | Derived smartphone-sensing Variable           | Description                                                                                                           |
|---------|---------|-----------------------------------------------|-----------------------------------------------------------------------------------------------------------------------|
|         |         | _locations                                    |                                                                                                                       |
| 53      |         | variables.off_peak_distinct_locations.entropy | Entropy of number geographic coordinates detected for the user with respect to distinct locations over off-peak hours |

<sup>a</sup> **Active:** Where Relgrav values that exceeds the stationary threshold range (0.8 to 1.2)

<sup>b</sup> **Screen On:** Where the user had their mobile screen switched on and unlocked.

<sup>c</sup> **Relgrav:** Relative gravity is a measure of acceleration experienced by the mobile device with reference to earth's gravity. This is calculated by collecting X-Y-Z axis acceleration from the device and then taking the ratio of the sum of squares of X, Y and Z axis values and square of gravity. A stationary device was considered to have relgrav ~1 (range: 0.8 to 1.2). While falling the ratio was considered <1 and while being lifted the ratio was considered >1

<sup>d</sup> **Light:** The total quantity of visible light in Lumens (SI unit) as detected by the light sensor in the device at a given instant.

<sup>e</sup> **Day-time hours:** 12:00 hours to 16:00 hours

<sup>f</sup> **Evening hours:** 17:00 hours to 23:59 hours

<sup>g</sup> **Night-time hours:** 00:00 hours to 6:00 hours

<sup>h</sup> **Morning hours:** 6:00 hours to 11:59 hours (AM)

<sup>l</sup> **Entropy:** is a measure of the uncertainty or unpredictability associated with a variable. It is measured as entropy of a variable with respect to x (where x is a variable with possible values

$$x_i). \text{Entropy} = - \sum_i (p(x_i) * \ln(p(x_i))) \quad \text{where } p(x_i) \text{ is probability of the } x_i \text{ th value}$$

<sup>j</sup> **Peak hours:** 8 AM to 10 PM for the user

<sup>k</sup> **Off-Peak hours:** 10 PM to 8 AM for the user

<sup>l</sup> **Home Location:** Geographic coordinates estimated to be the user's home location in a 250 metres radius. This is obtained by clustering user's locations during night time over 14 days

<sup>m</sup> **Distinct Location:** A region of diameter 250 metres within which one or more geographic locations lie.
